1  
2  
3  
4  
5  
6  
7  
8  
9  
10  
11  
12  
13  
14  
15  
16  
17  
18  
19  
20  
21  
22  
23  
24

Kinematics associated with treadmill walking in Rett Syndrome

Charles S. Layne<sup>1,2,3\*</sup>, David R. Young<sup>1,2</sup>, Beom-Chan Lee<sup>1,2</sup>, Daniel G. Glaze<sup>4,5</sup>, Aloysia Schwabe<sup>4,5</sup>, Bernhard Suter<sup>4,5</sup>

<sup>1</sup>Health and Human Performance, University of Houston, Houston, Texas, United States of America

<sup>2</sup>Center for Neuromotor and Biomechanics Research, University of Houston, Houston, Texas, United States of America

<sup>3</sup>Center for Neuro-Engineering and Cognitive Science, University of Houston, Houston, Texas, United States of America

<sup>4</sup> Texas Blue Bird Circle Rett Center, Texas Children’s Hospital, Houston, Texas, United States of America

<sup>5</sup>Baylor College of Medicine, Houston, Texas, United States of America

\*Corresponding author

E-mail: clayne2@uh.edu

## Kinematics of Rett walking

25 Abstract

26 Individuals with Rett syndrome suffer from severely impaired cognitive and motor performance.  
27 Current movement-related therapeutic programs often include traditional physical therapy  
28 activities and assisted treadmill walking routines for those patients who are ambulatory.  
29 However, there are no quantitative reports of kinematic gait parameters obtained during treadmill  
30 walking. Here we report the results of an investigation of 17 females diagnosed with typical Rett  
31 who walked on a treadmill as speed gradually increased. The objective included characterizing  
32 lower limb kinematics, including knee and hip joint range of motions, velocities, limb  
33 asymmetries, and the variance associated with these measures. Joint kinematics were obtained  
34 using a 12 camera motion capture system and associated processing and analysis software. Stride  
35 times progressively decreased as treadmill speeds increased although the range of speeds our  
36 participant could walk was quite slow: range 0.2 m/s – 0.5 m/s. There were significant main  
37 effects of speed on sagittal knee and hip range of motions and hip velocity. There were large  
38 joint asymmetries and variance values relative to both healthy walkers and others patient  
39 populations although variance values decreased as walking speed increased. There were  
40 significant correlations between joint range of motions and stride times and joint velocities and  
41 stride times. The results indicate that Rett patients can adapt their kinematic gait patterns in  
42 response to increasing treadmill speed but their ability to do so lies within a narrow range of  
43 speeds. We suggest that treadmill training for ambulatory individuals with Rett may further  
44 promote improved walking kinematics as well as overall health benefits.

45

46

47

## Kinematics of Rett walking

### 48 Introduction

49 Mutations in the gene coding for methyl-CpG-binding protein 2 (*MECP2*) result in the  
50 neurodevelopmental disorder Rett Syndrome (RTT). Although a relatively rare condition,  
51 worldwide RTT affects approximately 1 in 10,000 live born females [1]. Seemingly normal  
52 development occurs up to ages 6-18 months at which time a period of regression with loss of  
53 verbal skills and social interactions, as well as both fine and gross motor skills sets in.  
54 Stereotypical hand movement, breathing difficulties, apraxia, ataxia, muscle hypertonia, limb  
55 rigidity and bruxism are some of the disabling symptoms commonly observed. A period of  
56 stabilization ensues, but bipedal postural control and walking are severely compromised and  
57 walking ability often declines further at later ages, such that ultimately less than half remain able  
58 to walk.

59

60 Loss of ambulatory skills results in a number of additional physical problems such as muscle  
61 atrophy, limb contractures, decreased cardio-respiratory fitness and low overall physical fitness.  
62 Suggested physical therapy for patients with RTT has included physical exercise designed to  
63 increase physical fitness and to maintain walking ability. These therapies have ranged from  
64 traditional physical exercises and stretching [2] guided physical activities in a multi-sensory  
65 room [3], and hydrotherapy [4]. Other authors have suggested that a program incorporating  
66 walking may have a range of benefits for individuals with RTT including improved physical  
67 fitness as well as positively influencing their quality of life and wellbeing [5].

68

69

## Kinematics of Rett walking

70 There are several reports of those with RTT exploring the possibility of incorporating treadmill  
71 walking into their therapeutic regimen. Lotan et al. [6], explored the use of a treadmill-walking  
72 program to promote both walking skills and physical fitness and reported high correlations  
73 between improved walking performance and physical fitness. While promising, this study was  
74 conducted with only four girls with RTT. Three girls with RTT served as subjects for an  
75 exploratory investigation using robot-assisted walking [7] with preliminary results indicating the  
76 girls tolerated the robotic system suggesting that this might be a clinical tool that merits further  
77 investigation with RTT patients. These preliminary studies, while promising, leave open the  
78 applicability of these findings to a broader spectrum of ambulatory girls with RTT.

79

80 Motorized treadmills have been used extensively for gait training with populations suffering  
81 from conditions such cerebral palsy, stroke, and Parkinson's disease. The results of these studies  
82 indicate improvement in gait patterns after treadmill gait training. Gait training with motorized  
83 treadmills is standard practice with a variety of populations with gait disorders, including those  
84 with Parkinson's disease, cerebral palsy and stroke. Multiple investigations have documented  
85 improvements in overground gait parameters with the aforementioned populations resulting from  
86 treadmill gait training [8-13]. Individuals with RTT have neurological factors that are generally  
87 different than of those conditions listed immediately above, however there is no a priori reason to  
88 suggest that treadmill training would not provide benefits to those with RTT. Currently, treadmill  
89 walking is often a component part of therapy programs for those with RTT however its efficacy  
90 is unknown.

91

92 Prior to exploring the efficacy of a treadmill-walking program for both improved overall  
93 physical fitness and functional walking characteristics, it is important to identify some typical

## Kinematics of Rett walking

94 kinematic features associated with treadmill walking of patients with RTT. Such information is  
95 necessary to evaluate any potential improvements stemming from a treadmill-walking program.  
96 Although Downs and her colleagues have completed extensive efforts to develop reliable and  
97 valid measures of RTT walking that can be used as clinical measures [14] currently there are no  
98 reports of lower limb quantitative kinematics obtained from individuals with RTT during  
99 treadmill walking.

100

101 An important characteristic of effective walking is the ability to adapt to different speeds.  
102 Therefore, we were interested in determining if RTT patients could modify their gait to keep  
103 pace with increases in the speed of the treadmill. The basic rhythmical, alternating limb pattern  
104 driving locomotion has long been proposed to be the product of a network of spinal neurons that  
105 require the mediation of higher order structures for the complete expression of goal-directed  
106 walking. This network is commonly referred to as a central pattern generator i.e. CPG [15, 16,  
107 17]. Tonic innervation of the spinal locomotion circuits is regulated by noradrenalin and  
108 serotonin neurons. Without this innervation, which [18] suggests is impaired in those with RTT,  
109 due to the hypofunctioning of the aminergic neurons in the brainstem, proper functioning of the  
110 spinal circuit is impaired. However, input into the circuit from lower limb muscle spindles and  
111 foot contact information [19] can assist in activating the circuit to generate the basic locomotor  
112 pattern [20]. The well-documented toe walking exhibited by RTT patients is proposed to be an  
113 adapted behavior that generates increased spindle input to the spinal circuitry and therefore  
114 activates the circuit [18]. This suggests that the basic spinal locomotion circuitry remains  
115 generally intact and can be activated with increased sensory input.

116

## Kinematics of Rett walking

117 Successful adaptation to increasing treadmill speed for those with RTT would indicate that the  
118 neural mechanisms available to integrate the peripheral sensory information associated with  
119 increased limb speed in a manner that lower limb kinematic parameters could be successfully  
120 adapted to walk at a faster speed. Previous work by our group explored details of the temporal  
121 features of gait of individuals with RTT during both overground and treadmill walking [21]. It  
122 was reported there were increases in stance time but decreases in swing and double support time  
123 when comparing treadmill to overground gait. Additionally, treadmill walking resulted in  
124 decreased variance in the temporal gait parameters, indicating treadmill walking resulted in a  
125 more regularized gait. The current work provides the first description of quantitative kinematic  
126 data obtained during treadmill walking as the speed of the treadmill progressively increased.

127

## 128 **Methods**

### 129 Study Participants

130 Seventeen females diagnosed with typical RTT based upon the Neul et al. [22] criteria and  
131 carrying pathogenic MCEP2 mutation served as subjects in this study. They ranged in age from  
132 4 to 20 with a mean age of 10.8, standard deviation  $\pm$  5.3 and were receiving treatment at the  
133 Blue Bird Circle Rett Center at Baylor College of Medicine in Houston, TX. All subjects were  
134 able to independently walk without orthotics and none were taking medication that would be  
135 expected to impact their motor control function including benzodiazepines (often used for  
136 muscle tone control). All procedures were approved by the Institutional Review Boards of the  
137 Baylor College of Medicine (H-35835) and the University of Houston (00000855). The parents  
138 provided written informed consent for their daughters.

### 139 Data Collection

## Kinematics of Rett walking

140 The task involved the subjects walking on a dual-belt motorized treadmill (Bertec®) that  
141 contained force plates embedded under each belt. The subjects were secured in an overhead  
142 harness that eliminated any potential falls but did not provide postural support during walking.  
143 Walking was initiated at 0.1 m/s and was increased by 0.1 m/s every 20 seconds until either the  
144 parents indicated that was the maximum speed the subject could obtain or the subject began to  
145 exhibit signs of discomfort such as vocalizations, hand or facial gestures. Depending upon the  
146 subject's gait pattern and treadmill speed, the 20 seconds of data collection resulted in 10-14  
147 strides for each treadmill speed.

148  
149 Kinematic data were collected at 100 Hz using a Vicon® 12-camera motion capture system in  
150 combination with the plug-in gait data processing software. Reflective markers were applied  
151 bilaterally on the heel, toe, ankle, knee, shank and hips prior to data collection. Ground reaction  
152 forces from the treadmill force plates were sampled at 1000 Hz and synchronized with the  
153 kinematic data. Kinematic and force data were used in combination to identify heel strike and toe  
154 off. Additional details regarding the data collection procedures can be obtained in Layne et al.  
155 [23].

## 156 Data Processing and Analysis

157 A preliminary assessment of the data revealed that all 17 subjects were able to walk between the  
158 speeds of 0.2 and 0.5 m/s therefore the decision to analyze the kinematics associated with the  
159 speeds of 0.2, 0.3, 0.4 and 0.5 m/s was made. A custom MATLAB (MathWorks®) was used to  
160 filter the kinematic data with a Butterworth low-pass filter with a 6 Hz cut-off frequency.  
161 Bilateral heel strikes were detected and the data between consecutive ipsilateral heel strikes were  
162 saved as individual strides for both the right and left legs. Heel strikes were identified at the

## Kinematics of Rett walking

163 minimum position of the heel marker during each gait cycle. The toe marker minimum was used  
164 in the event the subject was toe walking on particular strides. The kinematic data were then time  
165 normalized such that each stride was represented by 100 samples. The time normalized  
166 waveforms were then amplitude normalized such that the angular value heel strike was zero  
167 degrees. For each normalized stride, sagittal plane knee and hip angles were obtained for each  
168 treadmill speed, for each subject. Maximum and minimum angular values were obtained and  
169 used to calculate the range of motion (ROM) for each stride. After the individual joint angles  
170 were obtained, the velocity curves for each angle were calculated. Peak angular velocity for each  
171 stride and each subject were also identified.

172

173 After the above processing was completed, the limb with the greater ROM, for each joint, was  
174 identified. The data was then reorganized into the side (i.e. left or right) with the strides of the  
175 greater ROMs grouped together and those stride with lesser ROMs grouped together. Symmetry  
176 indexes (SI) between greater and lesser joint angles were computed using the following formula  
177 [24]. A SI of 0 reflects perfect symmetry between the two limbs.

178

$$179 \quad \text{Symmetry Index} = 1 - \frac{\text{Lesser Angle}}{\text{Greater Angle}}$$

180

181 After it was determined that there were no significant differences between the joint ROM and  
182 associated peak velocities, the data from the two limbs was collapsed for further processing and  
183 analysis. The data from each variable were then averaged for each subject, at each gait speed,  
184 and group means calculated. It was found that many of variables were not normally distributed  
185 based upon the results of the Shapiro-Wilk test of normality. Therefore, Friedman tests were



## Kinematics of Rett walking

186 used to determine if significant differences existed between the ROMs for each joint across the  
187 four treadmill speeds. Follow up Wilcoxon tests were utilized as appropriate with a Bonferroni  
188 correction being applied. An alpha level of  $p < 0.05$  was adopted for significance. Pearson's  
189 correlation coefficients between a joint's ROM and its velocity and between stride times and  
190 ROMs were calculated. The above procedures were also applied to the peak velocity values to  
191 determine if limb velocity changes in response to increasing treadmill speed. To determine the  
192 relationship between the various variables associated with the gait of individuals with RTT,  
193 Pearson correlations coefficients between a joint's ROM and its velocity, between stride times  
194 and ROMs and between stride times and joint velocities were calculated. Correlations were also  
195 developed between subject age and joint ROMs and velocities. Finally, correlations were  
196 developed between stride times and subject age. To assess if the variance of the dependent  
197 measures was influenced by treadmill speed, the  $F$  test for equality of variance was employed.  
198  
199 Occasionally our subjects' feet would cross the midline and land with one foot in front of the  
200 other. Therefore, we were interested in determining the degree of knee joint motion in the  
201 horizontal plane. We applied the same processing techniques for the knee motion in the  
202 horizontal plane as those used for sagittal joint angles. Additionally, Downs et al. [5] reported  
203 minimal vertical motion of the hip during overground walking in her subjects with RTT assessed  
204 with the Actigraph GTX3 tri-axial accelerometer device. To determine if this reported lack of  
205 vertical hip motion is a common feature of RTT gait, we analyzed the motion of the pelvis in the  
206 coronal plane. Based on the literature, we identified the range (plus two standard deviations) of  
207 transverse knee motion for healthy individuals and determined which of our subjects exceeded  
208 that range. Similarly, we identified the range (minus two standard deviations) of the vertical

## Kinematics of Rett walking

209 motion of the hip and determined if any of our subjects failed to reach the degree of motion  
210 demonstrated by healthy walkers. Descriptive statistics of the number of subjects who either  
211 exceeded the healthy range of transverse knee motion or failed to display the healthy amount hip  
212 vertical motion are reported.

213

## 214 **Results**

215 The primary purpose of this investigation was to determine if individuals with RTT were able to  
216 adapt their lower limb kinematics and associated stride times as treadmill speed progressively  
217 increased. Secondary considerations included exploring the prevalence of excessive knee joint  
218 motion in the horizontal plane and pelvis motion in the frontal plane.

219

220 Table 1 displays that as treadmill speed increased from 0.2 to 0.5 m/s, our subjects were able to  
221 decrease their stride times so they could continue walking. The Friedman test revealed a  
222 significant effect for speed ( $\chi^2 = 86.698$ ,  $p < 0.000$ ). However, only three of the 17 subjects  
223 tested were able to continue walking up to the speed of 0.6 m/s. Thus, although our subjects were  
224 able to adapt to the increasing treadmill speeds, that ability was limited to a narrow range of  
225 speeds.

| Speed | Median (s) | Comparison | Z value | P values |
|-------|------------|------------|---------|----------|
| 0.2   | 1.43       |            |         |          |
| 0.3   | 1.27       | 0.2 vs 0.3 | -4.525  | 0.000    |
| 0.4   | 1.21       | 0.3 vs 0.4 | -4.505  | 0.000    |
| 0.5   | 1.17       | 0.4 vs 0.5 | -4.368  | 0.000    |

226

227 *Joint ROMs*

## Kinematics of Rett walking

228 The Friedman test revealed a significant main effect of speed on sagittal knee ROM ( $\chi^2 =$   
229 11.047,  $p < 0.011$ ). Follow up Wilcoxon tests indicated that the ROM between speeds 0.2 and  
230 0.3 (0.2 median = 9.425, 0.3 median = 10.03,  $Z = -2.812$ ,  $p < 0.005$ ) and 0.2 and 0.4 significantly  
231 different (0.2 median = 9.425, 0.4 median = 9.99,  $Z = -2.445$ ,  $p < 0.014$ ). No other comparisons  
232 reached significance (Figure 1). Comparisons between the sagittal hip ROM and treadmill speed  
233 revealed a significant main effect of speed ( $\chi^2 = 14.012$ ,  $p < 0.003$ ). Significant ROM  
234 differences existed between the ROM for speeds 0.2 and 0.3 (0.2 median = 10.155, 0.3 median =  
235 11.385,  $Z = -3.108$ ,  $p < 0.003$ ). There were no other significant differences for the hip ROM  
236 comparisons.

237

238 Figure 1 – Median Knee (A) and Hip (B) ROM across treadmill speeds

239

### 240 *Joint Peak Velocities*

241 For peak sagittal knee velocities in degrees per second, the Friedman test approached  
242 significance ( $\chi^2 = 7.238$ ,  $p < 0.065$ ). The Friedman test for peak sagittal hip velocities revealed a  
243 significant main effect of treadmill speed ( $\chi^2 = 14.633$ ,  $p < 0.002$ ). There were significant  
244 increases between treadmill speeds 0.2 and 0.3 (0.2 median = 35.0, 0.3 median = 39.1,  $Z = -$   
245 2.711,  $p < 0.007$ ) between speeds 0.2 and 0.4 (0.2 median = 35.0, 0.4 median = 45.3,  $Z = -2.711$ ,  
246  $p < 0.007$ ). Interestingly there was a significant decrease between speeds 0.4 and 0.5 (0.4  
247 median = 45.0, 0.5 median = 39.5,  $Z = -2.744$ ,  $p < 0.006$ ). The Friedman test for the knee  
248 velocity in the horizontal plane revealed no significant differences across the four speeds ( $\chi^2 =$   
249 4.575,  $p < 0.206$ ). Figure 2 displays the median angular velocities across the treadmill speeds and  
250 the associated  $R^2$  values.

251

## Kinematics of Rett walking

252 Figure 2 – Median knee (A) and hip (B) joint angular velocity across speeds.

There were no significant changes in the SIs for the knee and hip in the sagittal plane. Figure 3 does reflect that our subject's gait was asymmetrical with all SI values being significantly greater than 0 (i.e. perfect symmetry).

Figure 3 – Symmetry index values for the sagittal plane motion knee (solid fill) and hip joints across treadmill speeds.

The Pearson correlation value between subject age and stride time was 0.46 ( $R^2 = 0.21$ ) which is significant at the  $p < 0.01$  level. Figure 4 illustrates the high correlations between the joints' ROM and their associated velocities across the treadmill speed increases.

Figure 4 – Relationships between ROM and associated angular velocities across treadmill speeds.

Table 2 displays the Pearson R coefficients of the comparison between kinematic variables, stride times and subject age.

| Table 2 – Correlation between stride times, kinematics and age |        |       |
|----------------------------------------------------------------|--------|-------|
| Pearson Correlation Coefficients (R)                           | S Knee | S Hip |
| Joint ROM & Stride Times                                       | 0.38*  | 0.59* |
| Joint Angular Velocities & Stride Times                        | 0.45*  | 0.60* |
| Joint ROM & Age                                                | 0.15   | 0.37* |
| Joint Angular Velocity and Age                                 | 0.12   | 0.36* |

\*Significant at  $p < 0.01$

The F tests to assess potential differences in the variance associated with the joint ROM across speeds indicated that although the variance values were very high, there were no differences

## Kinematics of Rett walking

resulting from changes in treadmill speed. The same was true for the F tests comparing knee velocities across speeds. However, significant differences in variances were found for hip velocities between speeds 0.2 vs 0.4 ( $F = 2.444$ ,  $p < 0.006$ ), 0.2 vs 0.5 ( $F = 3.292$ ,  $p < 0.000$ ), and 0.3 vs 0.5 ( $F = 2.169$ ,  $p < 0.015$ ). In all cases of significant F tests, the slower speed was always associated with the greater variances relative to the faster speed (Table 3).

| Speed | Knee ROM | Hip ROM | Knee Velocity | Hip Velocity |
|-------|----------|---------|---------------|--------------|
| 0.2   | 25.9     | 32.0    | 0.048         | 0.071        |
| 0.3   | 35.8     | 30.3    | 0.046         | 0.047        |
| 0.4   | 34.8     | 23.1    | 0.043         | 0.029        |
| 0.5   | 21.7     | 19.9    | 0.027         | 0.022        |

Using a ROM of  $10^\circ$  to indicate excessive motion in the transverse plane based on values obtained with healthy individuals [25,26,27], there were only 13 instances, of a possible 136 that exceeded that threshold across all speeds and the two legs. There was no systematic effect of either age or speed on knee transverse plane motion. To determine if our subjects displayed healthy pelvic motion in the coronal plane we, used a threshold of  $0.7^\circ$  as a minimum value to indicate if there was adequate peak motion in this plane [28,29]. Of the 136 measures, only six values fell below the minimal threshold value and these values were confined to just two subjects. These data confirm, with very few exceptions, our subjects with RTT displayed a range of hip motion in the coronal plane associated with healthy gait. The median transverse plane knee ROMs and median peak degrees of the hip in the coronal plane across speeds are displayed in Figure 5.

Figure 5. Median ROMs for knee transverse plane motion and median peak degrees for hip coronal plane motion across treadmill speeds.

## 253 Discussion

## Kinematics of Rett walking

254 In this report, we provide the first laboratory-based information regarding kinematic gait data  
255 collected from females with RTT. Characterizing the kinematic parameters associated with  
256 walking of patients with RTT is important to determine if pharmacological or therapeutic  
257 approaches are successful. Additionally, we were interested in determining if those with RTT  
258 were able to successfully adapt their gait to increasing treadmill speeds. If so, this would suggest  
259 that despite abnormal kinematic parameters, neurological mechanisms remain intact to respond  
260 to the sensory feedback associated with increased treadmill speed and adapt their kinematic  
261 parameters accordingly.

262

263 As reported in Table 1, the subjects were able to decrease their stride times as treadmill speed  
264 increased as has been demonstrated in a sample of healthy subjects [30]. However, these  
265 decreases occurred within a relatively narrow range of treadmill speeds (0.2-0.5 m/s). To place  
266 both the treadmill speed and the stride times in perspective, in a large study of typically  
267 developing children ranging in age from 5 to 12, Lythgo et al. [31] found that when a sample of  
268 children who averaged 5.7 years of age were asked to walk slow, they averaged 0.97 m/s with  
269 average stride times of 0.99 seconds. Our average stride times ranged from 1.45 seconds at speed  
270 0.2 m/s to 1.10 seconds at speeds 0.5 m/s. The average 10.5 year old (similar to the average age  
271 in this investigation) in the Lythgo study averaged 1.04 m/s with average stride times of 1.15  
272 seconds when asked to adopt a slow gait. To provide additional perspective, 9.5 year old children  
273 diagnosed with spastic diplegic cerebral palsy (CP) walked at a self-selected speed 0.86 m/s on  
274 average during overground walking [32]. This value is 72% greater than the maximum speed our  
275 patients walked on the treadmill. An additional study reported that 10 year old children with  
276 bilateral CP walked at 0.83 m/s on average while those with unilateral CP walked on average at

## Kinematics of Rett walking

277 1.01 m/s [33]. Although not particularly surprising, these comparisons between children with CP  
278 and our subjects of similar age emphasize that girls with RTT walk significantly slower than  
279 those with CP.

280

281 Despite the minimal range of slow walking speeds, our subjects did decrease their stride times  
282 such that they were able to maintain pace with the increasing treadmill speeds. This finding  
283 strongly suggests that our subjects were able to both adequately detect the sensory information  
284 indicating the treadmill speed was increasing and integrate that information to increase their  
285 lower limb velocities that resulted in significantly decreased stride times. This is consistent with  
286 Aoi et al's [19] assertion that foot contact information and muscle spindle input can activate the  
287 CPG and adjust the locomotor pattern to meet the lower limb movement demands associated  
288 with increasing treadmill speed. Consistent with the decrease in stride times are the significant  
289 increases of knee and hip ROMs and angular velocity associated with increases treadmill speed  
290 as has been reported for a large range of healthy individuals [34,35,36]. These significant main  
291 effects and the highly significant correlations between knee and hip ROM and their associated  
292 angular velocities (see Figure 5) also reflect our subjects' ability to modify their lower limb  
293 kinematic motion to adapt to the increasing treadmill speeds. Our data thereby suggest that our  
294 females with RTT do have intact spinal locomotion circuitry that can be regulated by the sensory  
295 input generated by walking within a narrow range of walking speeds. We speculate that our  
296 subjects are unable to increase their walking speed beyond 0.5 m/s is primarily related to their  
297 failure to maintain their attention on the walking task as well as their inability to preserve  
298 postural stability despite the safety that the harness provided.

299

## Kinematics of Rett walking

300 Although the spinal CPG may be able to produce the fundamental alternating lower limb motion  
301 necessary to walk, the associated kinematics display a large amount of variance and the  
302 relationship between the two limbs is asymmetric. These features contribute to our subject's lack  
303 of postural stability, which therefore prevents them from being able to increase their walking  
304 speed. As observed in Figures 3 and 4, our subjects had large symmetry indices and it is worth  
305 noting that there was a significant linear trend for knee flexion asymmetry to increase as  
306 treadmill speed increased ( $R^2 = 0.90$ ). For comparative purposes, a gait study of patients with  
307 peroneal nerve palsy displayed median knee joint angular asymmetry of 20% from perfect  
308 symmetry [37] while a group of healthy subjects displayed a 3.7% deviation from perfect  
309 symmetry [38]. In contrast, our knee joint asymmetries ranged from 26% at 0.2 m/s to 36% at  
310 0.5 m/s. reflecting a high degree of asymmetry.

311

312 Another notable feature of the kinematics exhibited by our subjects is the very small range of  
313 knee joint motion despite some minimal but statistically significant speed-related increases.  
314 Consistent with our results, previous investigations have also reported minimal changes in knee  
315 motion associated with small increases in walking speed [39]. The median values ranged from  
316 9.4 at 0.2 m/s to 10.3 at 0.5 m/s. This minimal knee ROM can be characterized as 'stiff-knee  
317 gait' (SKG) and contributes to the slow speeds at which our subjects were able to walk. °.  
318 Healthy individuals when asked to walk at 0.3 m/s on a treadmill, a speed that our subjects  
319 walked, had an average knee ROM of 46.1 and a hip ROM of 29.6 [39]. Carriero et al. [32]  
320 published data from a sample of children with spastic diplegia CP aged 9.5 years and reported a  
321 mean range of 41.3° while an aged match sample of typically developing children displayed a  
322 ROM of 65.4°. Individuals post-stroke also exhibit significantly reduced knee ROM during gait



## Kinematics of Rett walking

323 [40,41]. For example, the post-stroke subject's in Chen et al.'s [40] investigation displayed peak  
324 knee flexion of  $37.8^\circ$  with their paretic limb while healthy controls had average peak knee  
325 flexion values of  $61.9$ . Thus, even patient populations that have been characterized as displaying  
326 SKG had significantly greater knee motion than ambulatory females with RTT. Concerning hip  
327 ROM in the sagittal plane, Carriero's et al. study [32] reported a range of  $47.1$  for children with  
328 CP and  $49.9$  for typically developing children. Again, these values are significantly greater than  
329 observed in the current study.

330

331 Our sample of females with RTT have an extremely limited lower limb ROM as well as a limited  
332 range of walking speeds. Both post-stroke individuals and those with CP who exhibit stiff-knee  
333 gait also display compensatory kinematic strategies, primarily hip hiking and increased  
334 circumduction to ensure adequate toe clearing [40,42]. Interestingly, except in rare cases, our  
335 subjects showed no tendency toward either of the traditional kinematic compensations associated  
336 with SKG. The treadmill speeds were such that despite the limited of knee and hip ROMs they  
337 were able to achieve enough toe clearance to maintain limb motion at the given speeds that  
338 matched the treadmill belt speed. This is consistent with a recent report that ambulatory females  
339 with RTT were able to walk on a treadmill [43]. However, this report did not indicate the speeds  
340 at which their subjects walked only that they walked for six minutes at their 'maximal' speed. As  
341 previously mentioned, for the vast majority of our subjects as the treadmill speed exceeded  $0.5$   
342 m/s our subjects exhibited signs of discomfort and the treadmill speed was immediately  
343 decreased and testing discontinued. We hypothesize that, unlike those with CP or post-stroke  
344 who walk faster than our subjects and demonstrate compensatory kinematic strategies, our  
345 subjects with RTT were unable to modify their kinematic strategies that would enable them to

## Kinematics of Rett walking

346 walk at faster speeds. Possible factors that may contribute to our participants' slow gait speeds  
347 are discussed below.

348

349 There are several factors identified in the literature that are related to severely reduced lower  
350 limb ROMs, particularly that of the knee. Often individuals with CP and post-stroke demonstrate  
351 SKG and this is often been attributed to hyperactivity of the rectus femoris [36,44]. Another  
352 suggested cause of SKG is a lack of adequate push off at the ankle [45], leading to a reduced  
353 knee velocity at toe off and therefore reduced passive knee flexion [46,47]. Reduced hip joint  
354 velocity associated with weak hip flexors is also suggested to be a potential cause of SKG  
355 [48,49]. All of these muscle-related issues are likely to be factors in the severely reduced lower  
356 limb ROMs and contribute to slow walking speeds observed in the current study

357

358 Besides resulting in gait kinematics that significantly reduce the speed at which our subjects  
359 could walk, these kinematic patterns are energy inefficient [40,50] with oxygen consumption and  
360 cost being elevated [51]. An investigation of 12 females with RTT who walked for six minutes  
361 on a treadmill, reported that energy production was low relative to healthy subjects that could  
362 result in tiredness within a few minutes of walking [43]. As observed in Figures 3 and 4, our  
363 subjects had large symmetry indices and it is worth noting that there was a significant linear  
364 trend for knee flexion asymmetry to increase as treadmill speed increased ( $R^2 = 0.90$ ). For  
365 comparative purposes, a gait study of patients with peroneal nerve palsy displayed median knee  
366 joint angular asymmetry of 20% from perfect symmetry [37], while a group of healthy subjects  
367 displayed a 3.7% deviation from perfect symmetry [38]. In contrast, our knee joint asymmetries  
368 ranged from 26% at 0.2 m/s to 36% at 0.5 m/s. reflecting a high degree of asymmetry.

## Kinematics of Rett walking

369 Significant kinematic asymmetries during gait are part of an overall pattern of lower limb motion  
370 that is energetically inefficient and will result in a rapid rate of fatigue development.

371

372 As has previously been reported, there was a significant positive relationship between our  
373 subject's stride times and age [21]. Interestingly however, there were low (hip) and negligible  
374 (knee) relationships between age and ROM and age and angular velocity (Table 2). Conversely,  
375 there were significant positive relationships between both knee and hip ROM with stride time  
376 and angular joint velocities with stride time. This is consistent with previous reports in that speed  
377 is a greater indicator of associated kinematic gait variables than is age [52,53] and this  
378 relationship appears to hold true for those with RTT.

379

380 The data from the current study provides evidence that a relatively large sample of ambulatory  
381 individuals with RTT are able to walk on the treadmill and modify their kinematic pattern such  
382 that they are able to increase their walking speed within a limited range. Despite kinematic  
383 patterns that lead to SKG, poor dynamic postural control and limited concentration on the  
384 walking task, we suggest that those with RTT would benefit from a physical activity program  
385 that includes regular bouts of treadmill walking [3,5,21,43]. Heart rate, cardiac vagal tone, mean  
386 arterial blood pressure and cardiac sensitivity to baroreflex, and transcutaneous partial pressures  
387 of oxygen sampled in females with RTT respond to treadmill walking in patterns that are similar  
388 to those of healthy individuals [43]. In a recent review article focused on evaluating post-stroke  
389 physical activity programs, it was reported that three studies that used a treadmill walking  
390 intervention found significant improvements in peak oxygen uptake after the intervention [54].  
391 These findings strongly suggest that ambulatory patients with RTT can achieve improved

## Kinematics of Rett walking

392 physical fitness resulting from a walking fitness program despite the challenges they must  
393 overcome.

394

395 Besides improved physical fitness, a second benefit of a treadmill walking program would be  
396 potential improvements in gait kinematics and postural control dynamics that could result in  
397 increases in walking speed. Increases in walking speed have been reported to improve gait  
398 kinematics. For example, 20 post-stroke subjects were exposed to a treadmill walking protocol  
399 that required them to walk as fast as possible. The results demonstrated that compared with their  
400 self-selected speed, walking as fast as possible improved the symmetry between their hemi-  
401 paretic and nonparetic limbs, as well as increases in knee and hip ROM [55]. Willerslev-Olsen,  
402 et al. [56] reported that the benefits of daily treadmill training over one month with 16 children  
403 with CP included, significant increases in speed, improved dorsiflexion during the late portion of  
404 the swing phase and increase weight acceptance on the heel during early stance. The authors  
405 proposed that treadmill gait training may promote plasticity in the corticospinal tract driven by  
406 sensory input into the CPG and results in their observed improvements in gait. Similar results  
407 following treadmill gait training were reported in patients who had incomplete spinal cord  
408 injuries [57].

409

410 An important finding is that improvement in gait kinematics can be achieved by walking at less  
411 than an individual's maximal speed during treadmill training [55]. Although this study was  
412 completed with individuals with chronic stroke, it has direct relevance for those with RTT who  
413 often struggle to sustain their maximal achievable gait speed, even during treadmill walking.  
414 Beyond, improvement in physical fitness and gait parameters, regular walking has the potential

## Kinematics of Rett walking

415 to positively influence quality of life and wellbeing of those with RTT. Given the above  
416 information, it is reasonable to hypothesize that ambulatory females with RTT will also benefit  
417 from a treadmill gait training protocol.

418

419 In conclusion, our investigation has demonstrated that ambulatory females with RTT are able to  
420 adapt their stride times and lower limb kinematics in response to increases in treadmill belt  
421 speed, albeit within a very narrow range of gait speeds. Additionally, we have characterized  
422 several kinematic parameters associated with RTT, including very limited knee and hip ROM  
423 and significant asymmetrical motion. Despite the altered gait characteristics, we propose that a  
424 treadmill walking training program can improve the overall physical fitness as well as kinematic  
425 parameters, thereby improving the quality of life for those with RTT.

426

427

428

429

430

431

432

433

434

435

436

437

## Kinematics of Rett walking

438

439

440

### 441 References

442 1. Kerr AM. Early clinical signs in the Rett disorder. *Neuropediatrics* 1995; 26(2): 67–71.

443

444 2. Hanks SB. Motor disabilities in the Rett syndrome and physical therapy strategies. *Brain Dev*  
445 1990; 12: 157-161.

446

447 3. Lotan M, Shapiro M. Management of young children with Rett disorder in the controlled  
448 multi-sensory (Snoezelen) environment. *Brain Dev.* 2005; Nov;27 Suppl 1: S88-S94.

449

450 4. Bumin G, Uvanik M, Yilmaz I, Kayihan H, Topcu M. Hydrotherapy for Rett syndrome. *J*  
451 *Rehabil Med.* 2003; 35: 44-45.

452

453 5. Downs J, Leonard H, Jacoby P, Brisco L, Baikie G, Hill K. Rett syndrome: establishing a  
454 novel outcome measure for walking activity in an era of clinical trials for rare disorders. *Disabil*  
455 *Rehabil.* 2015; 37: 1992-1996.

456

457 6. Lotan M, Isakov E, Merrick J. Improving functional skills and physical fitness in children  
458 with Rett syndrome. *J Intellect Disabil Res.* 2004; 48: 730-735.

459

## Kinematics of Rett walking

- 460 7. Krebs HI, Peltz AR, Berkowe J, Angacin G, Cortes M, Edwards D. Robotic biomarkers in  
461 RETT Syndrome: Evaluating stiffness. 2016; 6th IEEE International Conference on Biomedical  
462 Robotics and Biomechatronics (BioRob). 2016; June, Singapore. DOI:  
463 10.1109/BIOROB.2016.7523704
- 464 8. Baer GD, Salisbury LG, Smith MT, Pitman J, Dennis M. Treadmill training to improve  
465 mobility for people with sub-acute stroke: a phase II feasibility randomized controlled trial. *Clin*  
466 *Rehabil.* 2018; 32(2): 201-212.
- 467
- 468 9. Bello O, Sanchez JA, Lopez-Alonso V, Marquez G, Morenilla L, Castro X, et al. The effects  
469 of treadmill or overground walking training program on gait in Parkinson's disease. *Gait*  
470 *Posture.* 2013; 38: 590-595.
- 471
- 472 10. Bryant MS, Workman CD, Hou JG, Henson HK, York MK. Speed and temporal-distance  
473 adaptations during treadmill and overground walking following stroke. *PM R.* 2016; 8(12): 1151-  
474 1158.
- 475
- 476 11. Grecco LCN, Zanon L, Sampaio LMM, Oliveira, CS. A comparison of treadmill training and  
477 overground walking in ambulant children with cerebral palsy: randomized controlled clinical  
478 trial. *Clin Rehabil.* 2013; 27: 686-696.
- 479
- 480 12. Klamroth S, Steib S, Gaßner H, Goßler J, Winkler J, Eskofier B. et al. Immediate effects of  
481 perturbation treadmill training on gait and postural control in patients with Parkinson's disease.  
482 *Gait Posture.* 2016; 50: 102-108.

## Kinematics of Rett walking

483

484 13. Rose DK, Nadeau SE, Wu SS, Tilson JK, Dobkin BH, Pei Q, Duncan PW. Locomotor  
485 training and strength and balance exercises for walking recovery after stroke: Response to  
486 number of training sessions. *Phys Ther.* 2017; 97: 1066-1074.

487 14. Downs J, Leonard H, Wong K, Newton N, Hill K. Quantification of walking-based physical  
488 activity and sedentary time in individuals with Rett syndrome. *Dev Med Child Neurol.* 2017 Jun;  
489 59(6): 605-611.

490

491 15. Danner SM, Hofstoetter US, Freundl B, Binder H, Mayr W, Rattay F, et al., Human spinal  
492 locomotor control is based on flexibly organized burst generators. *Brain.* 2015; 138: 577-588.

493

494 16. Grillner S. Control of locomotion in bipeds, tetrapods, and fish. In: Brooks VD, editor.  
495 Handbook of physiology. Section 1: The nervous system, vol. II. Motor control. Bethesda, MD:  
496 American Physiological Society. 1981: 1179–1236.

497

498 17. Haghpanah SA, Farahmand F, Zohoor H. Modular neuromuscular control of human  
499 locomotion by central pattern generator. *J Biomech.* 2017; 53: 154-162.

500

501 18, Segawa M. Early motor disturbances in Rett syndrome and its pathophysiological  
502 importance. *Brain Dev.* 2005; 27 Suppl 1:S54-S58.

503



## Kinematics of Rett walking

- 504 19. Aoi S, Ogihara N, Sugimoto AY, Tsuchiya K. Simulating adaptive human bipedal  
505 locomotion based on phase resetting using foot-contraction information. *Adv Robot.* 2008; 22:1697-  
506 1713.
- 507
- 508 20. Markin SN, Klishko AN, Shevtsova NA, Lemay MA, Prilutsky, BI, Rybak IA. Afferent  
509 control of locomotor CPG: insights from a simple neuromechanical model. *Ann NY Acad Sci.*  
510 2010; 1198:21-34.
- 511
- 512 21. Layne, CS, Lee B-C., Young D, Glaze DG, Schwabe A, Suter, B. Temporal Gait Measures  
513 Associated with Overground and Treadmill Walking in Rett Syndrome. *J Child Neuro.* 2018;  
514 33(10): 667-674.
- 515
- 516 22. Neul JL, Kaufmann WE, Glaze DG, et al. Rett syndrome: revised diagnostic criteria and  
517 nomenclature. *Ann Neurol.* 2010; 68: 944–50.
- 518
- 519 23. Layne CS, Lee B-C, Young D, Knight A, Glaze DG, Suter B. Methodologies to objectively assess  
520 gait and postural control features in Rett syndrome. *RARE Journal.* 2017 Dec; 4(1): 1-7, 2017  
521
- 522 24. Hsu AL, Tang PF, Jan MH. Analysis of impairments influencing gait velocity and  
523 asymmetry of hemiplegic patients after mild to moderate stroke. *Arch Phys Med Rehabil.* 2003  
524 Aug; 84(8): 1185-1193.
- 525
- 526 25. McClelland JA, Webster KE, Feller JA, Menz HB. Knee kinematics during walking at  
527 different speeds in people who have undergone total knee replacement. *Knee.* 2011; 18: 151-155.

## Kinematics of Rett walking

528

529 26. Nester C. The relationship between transverse plane leg rotation and transverse plane motion  
530 at the knee and hip during normal walking. *Gait Posture*. 2000; 12: 251–256.

531

532 27. Stief F, Böhm H, Dussa CU, Multerer C, Schwitz A, Imhoff AB, et al. Effect of lower limb  
533 malalignment in the frontal plane on transverse plane mechanics during gait in young individuals  
534 with varus knee alignment. *Knee*. 2014; 21: 688-693.

535

536 28. Heyrman L, Feys H, Molenaers G, Jaspers E, Monari D, Meyns P, et al. Three-dimensional  
537 head and trunk movement characteristics during gait in children with spastic diplegia. *Gait*  
538 *Posture*. 2013; 38: 770-776.

539

540 29. Molina-Rueda F, Alguacil-Diego IM, Cuesta-Gómez A, Iglesias-Giménez J, Martín-Vivaldi  
541 A, Miangolarra-Page JC. Thorax, pelvis and hip pattern in the frontal plane during walking in  
542 unilateral transtibial amputees: biomechanical analysis. *Braz J Phys Ther*. 2014 May-June;  
543 18(3): 252-258.

544

545 30. Arendt-Nielsen L, Sinkjrer T, Nielsen J, Kallesøe K. Electromyographic patterns and knee  
546 joint kinematics during walking at various speeds. *J Electromyogr Kinesio*. 1990; 1(2): 89-95.

547

548 31. Lythogo N, Wilson C, Galea M. Basic gait and symmetry measures for primary school-aged  
549 children and young adults. II: Walking at slow, free and fast speed. *Gait Posture*. 2011; 33: 29-  
550 35.

551

## Kinematics of Rett walking

- 552 32. Carriero A, Zavatsky A, Stebbins J, Theologis T, Shefelbine SJ. Correlation between lower  
553 limb bone morphology and gait characteristics in children with spastic diplegic cerebral palsy. *J*  
554 *Pediatr Orthop.* 2009; 29: 73-79.
- 555
- 556 33. Delabastita T, Desloovere K, Meyns P. Restricted arm swing affects gait stability and  
557 increased walking speed alters trunk movements in children with cerebral palsy *Front Hum*  
558 *Neurosci.* 2016 Jul; 10: 354.
- 559
- 560 34. Lelas JL, Merriman GJ, Riley PO, Kerrigan DC, Predicting peak kinematic and kinetic  
561 parameters from gait speed. *Gait Posture.* 2003; 17: 106-112.
- 562
- 563 35. Oberg T, Karsznia A, Oberg K. Basic gait parameters: reference data for normal subjects, 10-  
564 79 years of age. *J Rehabil Res Dev.* 1993; 30(2): 210-223.
- 565
- 566 36. Stoquart G, Detrembleur C, Lejeune T. Effect of speed on kinematic, kinetic,  
567 electromyographic and energetic reference values during treadmill walking. *Clin Neurophysiol.*  
568 2008; 38: 105-116.
- 569
- 570 37. Kutilek P, Viteckova S, Svoboda Z, Smrcka P. Kinematic quantification of gait asymmetry in  
571 patients with peroneal nerve palsy based on bilateral cyclograms. *J Musculoskelet Neuronal*  
572 *Interact.* 2013; 13(2): 244-250.
- 573

## Kinematics of Rett walking

- 574 38. Hadizadeh M, Amri S, Mohafez H, Roohi SA, Mokhtar AH. Gait analysis of national  
575 athletes after anterior cruciate ligament reconstruction following three stages of rehabilitation  
576 program: Symmetrical perspective. *Gait Posture*. 2016; 48: 152-158.  
577
- 578 39. Nymark JR, Balmer SJ, Melis EH, Lemaire ED, Millar S. Electromyographic and kinematic  
579 nondisabled gait differences at extremely slow overground and treadmill walking speeds. *J*  
580 *Rehabil Res Dev*. 2005; 42(4): 523-534.  
581
- 582 40. Chen G, Patten C, Kothari DH, Zajac FE. Gait differences between individuals with post-  
583 stroke hemiparesis and non-disabled controls at matched speeds. *Gait Posture*. 2005; 22: 51-56.  
584
- 585 41. Stanhope VA, Knarr BA, Reisman DS, Higginson JS. Frontal plane compensatory strategies  
586 associated with self-selected walking speed in individuals post-stroke. *Clin Biomech*. 2014 May;  
587 29(5): 518–522.  
588
- 589 42. Kerrigan DC, Frates EP, Rogan S, Riley PO. Spastic paretic stiff-legged gait: biomechanics  
590 of the unaffected limb. *Am J Phys Med Rehabil*. 1999; 78: 354-360.  
591
- 592 43. Larsson G, Julu POO, Engerstrom IW, Sandlund M, Lindstrom B. Walking on treadmill  
593 with Rett syndrome-Effects on the autonomic nervous system. *Res Dev Disabil*. 2018; Dec;83:  
594 99-107.  
595

## Kinematics of Rett walking

- 596 44. Sutherland DH, Santi M, Abel MF. Treatment of stiff-knee gait in cerebral palsy: a  
597 comparison by gait analysis of distal rectus femoris transfer versus proximal rectus release. *J*  
598 *Pediatr Orthop*. 1990 Jul-Aug; 10(4): 433-441.
- 599
- 600 45. Kerrigan DC, Gronley J, Perry J. Stiff-legged gait in spastic paresis. A study of quadriceps  
601 and hamstrings muscle activity. *Am J Phys Med Rehabil*. 1991 Dec; 70(6): 294-300.
- 602
- 603 46. Goldberg SR, Ounpuu S, Delp SL. The importance of swing-phase initial conditions in stiff-  
604 knee gait. *J Biomech*. 2003 Aug; 36: 1111-1116.
- 605
- 606 47. Akalan NE, Kuchimov S, Aпти A, Temelli Y, Nene A. Contributors of stiff knee gait pattern  
607 for able bodies: Hip and knee velocity reduction and tiptoe gait. *Gait Posture*. 2016 Jan; 43: 176-  
608 81.
- 609
- 610 48. Goldberg SR, Anderson FC, Pandy MG, Delp SL. Muscles that influence knee flexion  
611 velocity in double support: implications for stiff-knee gait. *J Biomech*. 2004 Aug; 37(8): 1189-  
612 96.
- 613
- 614 49. Akalan NE, Kuchimov S, Aпти A, Temelli Y, Nene A. Weakening iliopsoas muscle in  
615 healthy adults may induce stiff knee pattern. *Acta Orthop Traumatol Turc*. 2016; 50: 642-648.
- 616
- 617 50. Waters RL, Mulroy S. The energy expenditure of normal and pathologic gait. *Gait Posture*.  
618 1999; 9: 207-231.
- 619

## Kinematics of Rett walking

- 620 51. Waters RL, Yakura JS, Adkins R, Barnes G. Determinants of gait performance following  
621 spinal cord injury. *Arch Phys Med Rehabil.* 1989 Nov; 70(12): 811-8.  
622
- 623 52. Standsfield BW, Hillman SJ, Hazlewood ME, Lawson AA, Mann AM, Loudon IR, et al.  
624 Normalized Speed, Not Age, Characterizes Ground Reaction Force Patterns in 5- to 12-Year-Old  
625 Children Walking at Self-Selected Speeds. *J Pediatr Orthop.* 2001; 21: 395–402.
- 626 53. Stansfield BW, Hillman SJ, Hazlewood ME, Robb JE. Regression analysis of gait parameters  
627 with speed in normal children walking at self-selected speeds. *Gait Posture.* 2006; 23: 288-294.  
628
- 629 54. Wonsetler EC, Mark G. Bowden MG. A systematic review of mechanisms of gait speed  
630 change post-stroke. Part 2: Exercise capacity, muscle activation, kinetics, and kinematics. *Top*  
631 *Stroke Rehabil.* 2017 July; 24(5): 394–403.  
632
- 633 55. Tyrell CM, Roos MA, Rudolph KS, Reisman DS. Influence of systematic increases in  
634 treadmill walking speed on gait kinematics after stroke. *Phys Ther.* 2011; 91: 391-403.  
635
- 636 56. Willerslev-Olsen M, Petersen TH, Farmer SF, Nielsen JB. Gait training facilitates central  
637 drive to ankle dorsiflexors in children with cerebral palsy. *BRAIN* 2015; 138: 589–603.  
638
- 639 57. Norton JA, Gorassini MA. Changes in cortically related intermuscular coherence  
640 accompanying improvements in locomotor skills in incomplete spinal cord injury. *J*  
641 *Neurophysiol.* 2006 Apr; 95(4): 2580-2589.  
642  
643

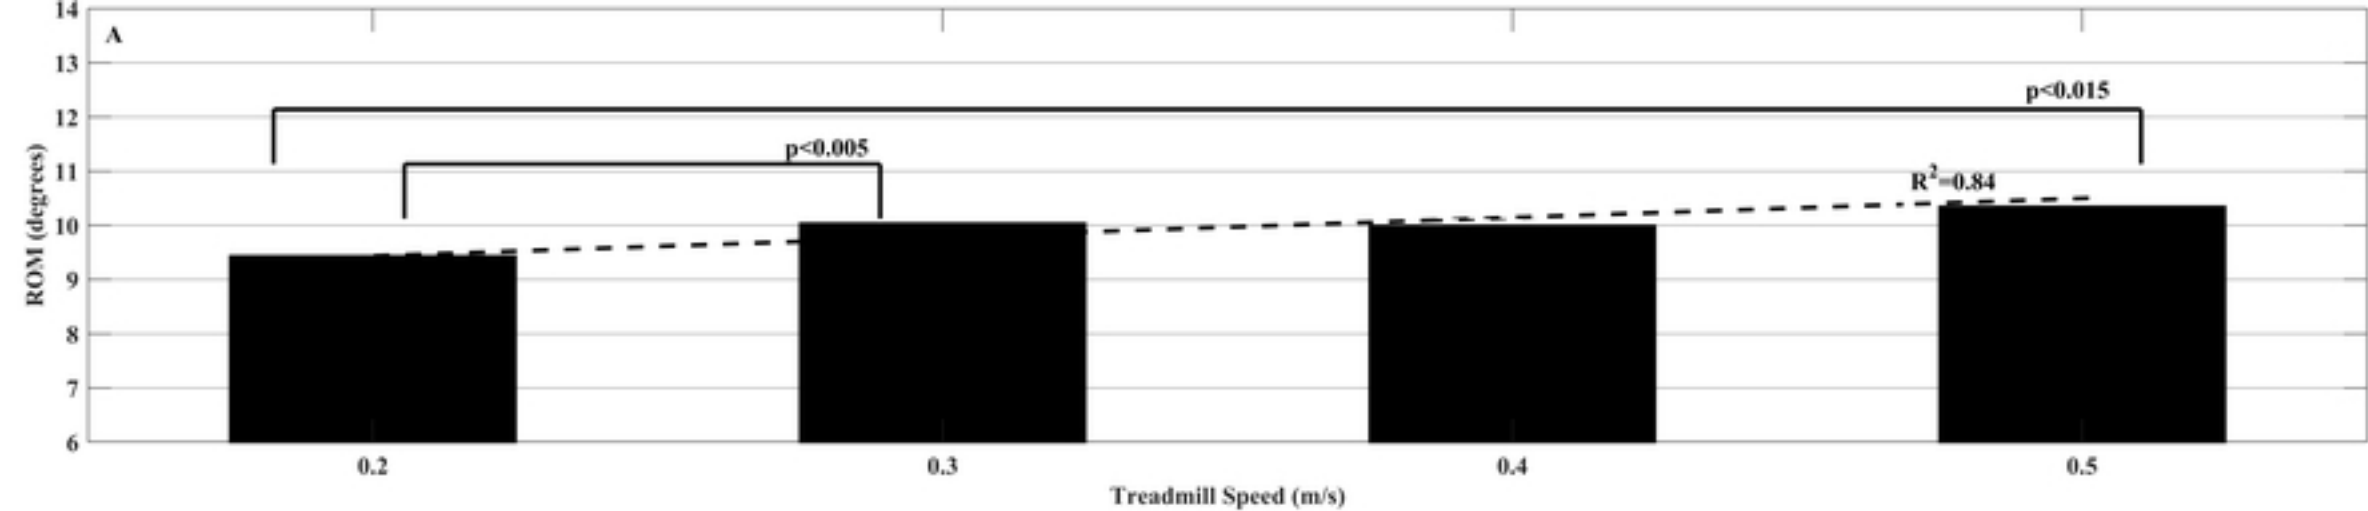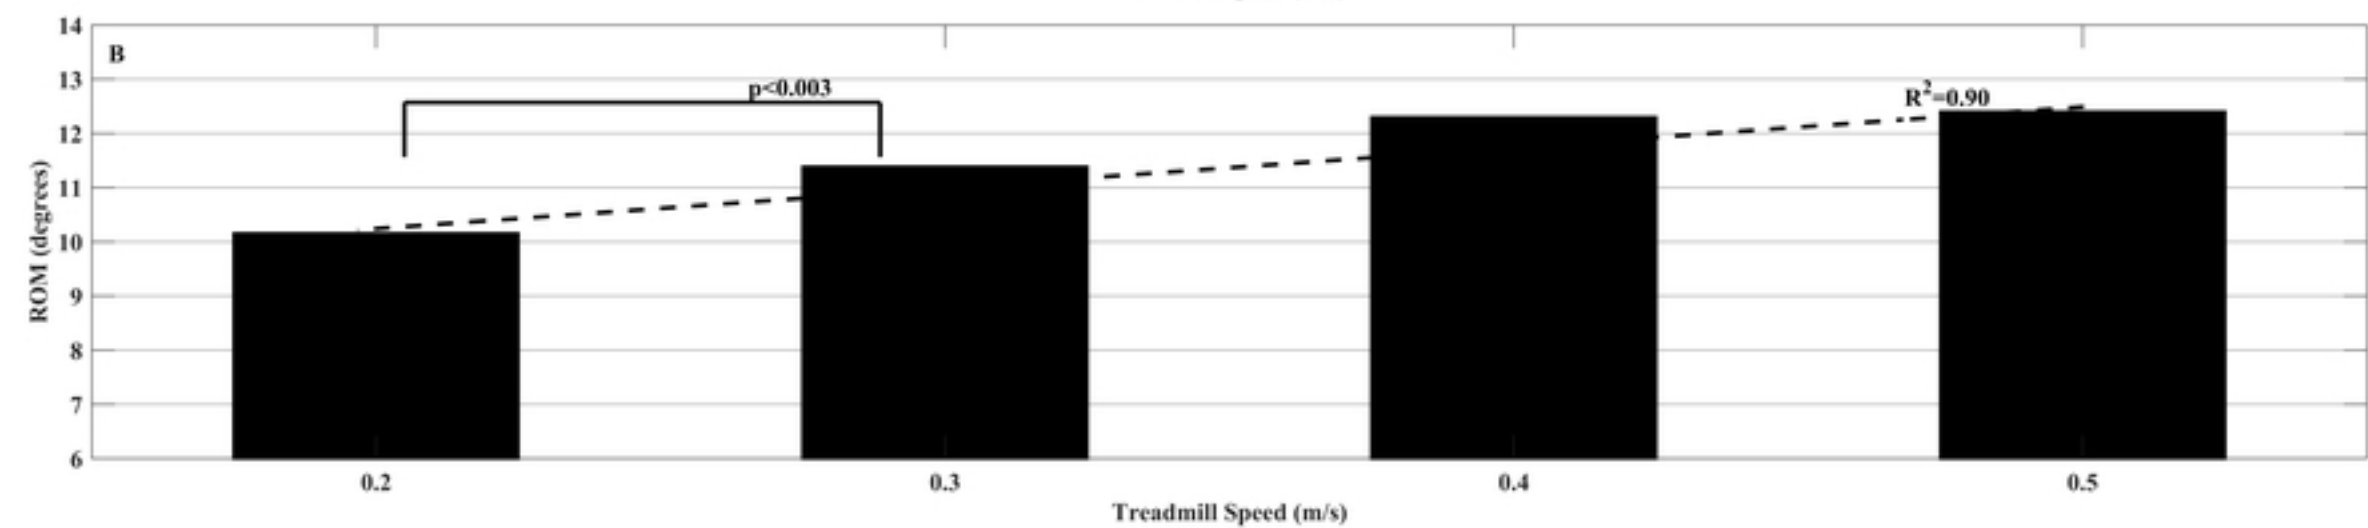

Fig 1

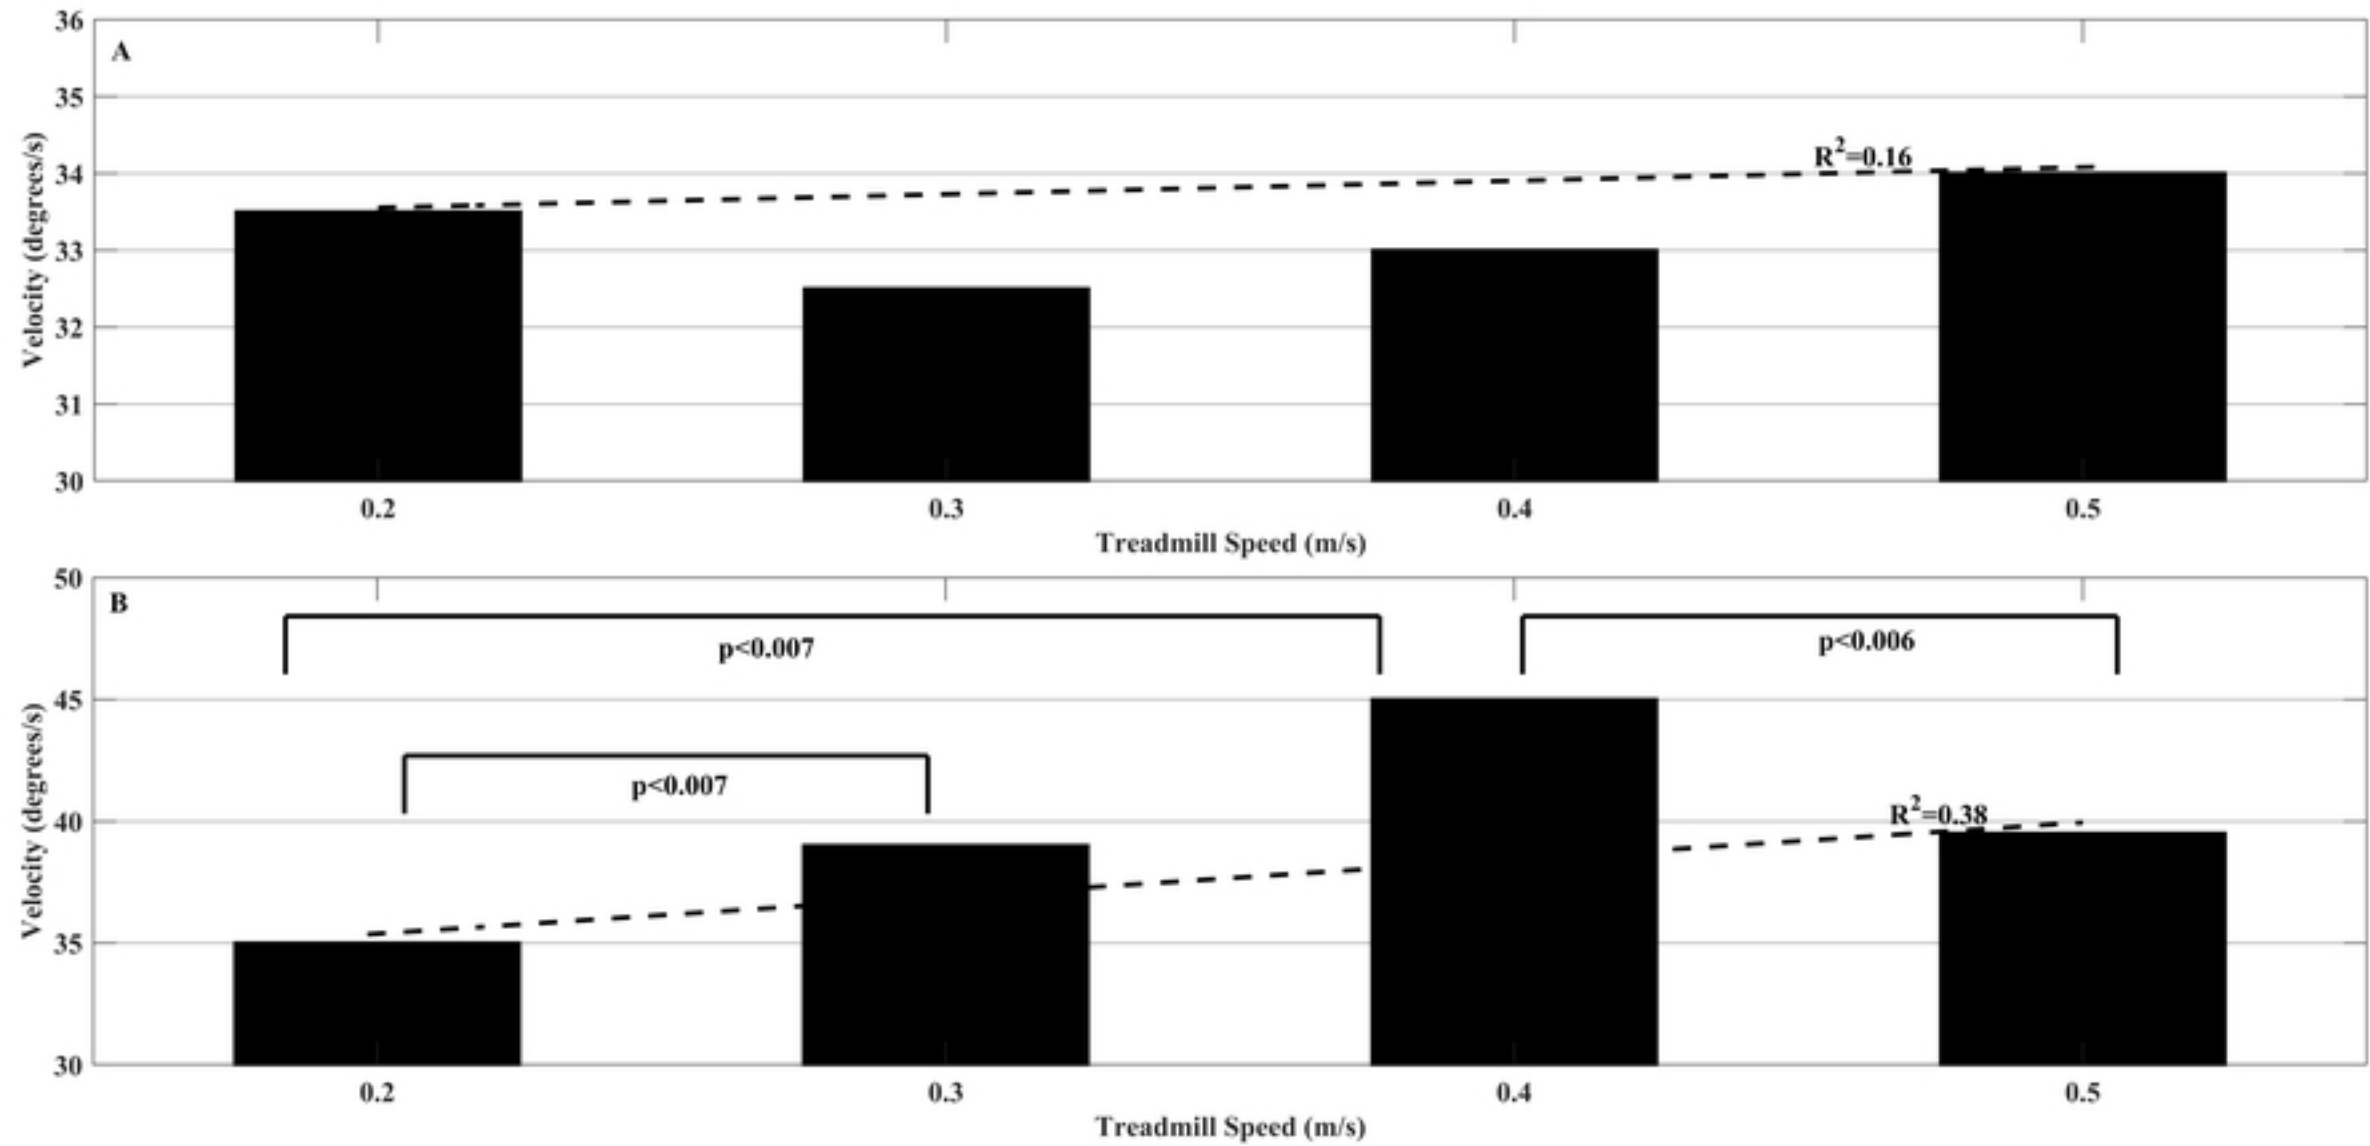

Fig 2



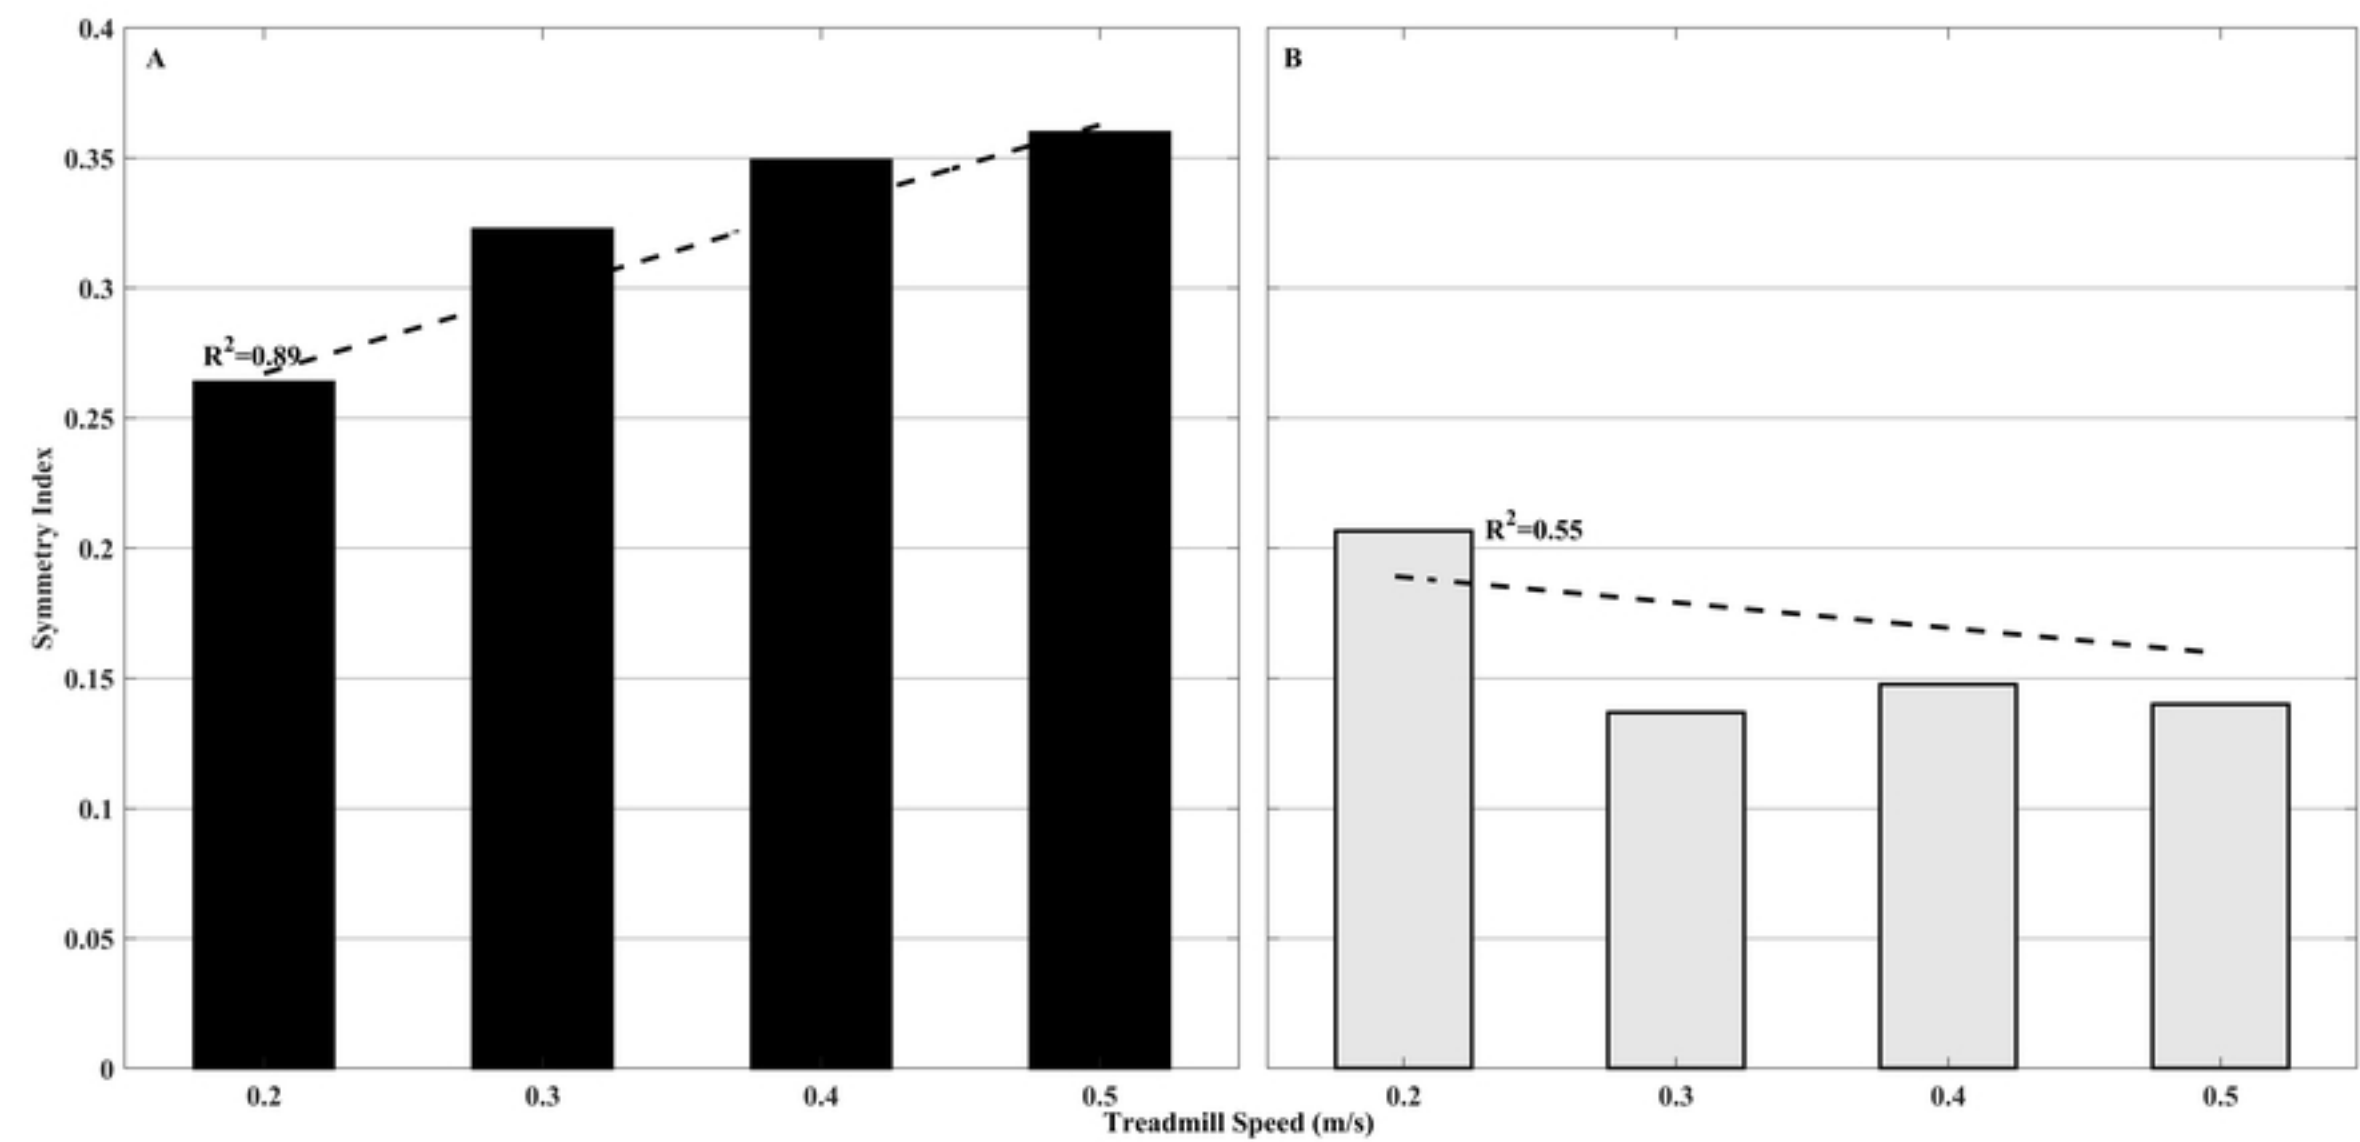

Fig 3

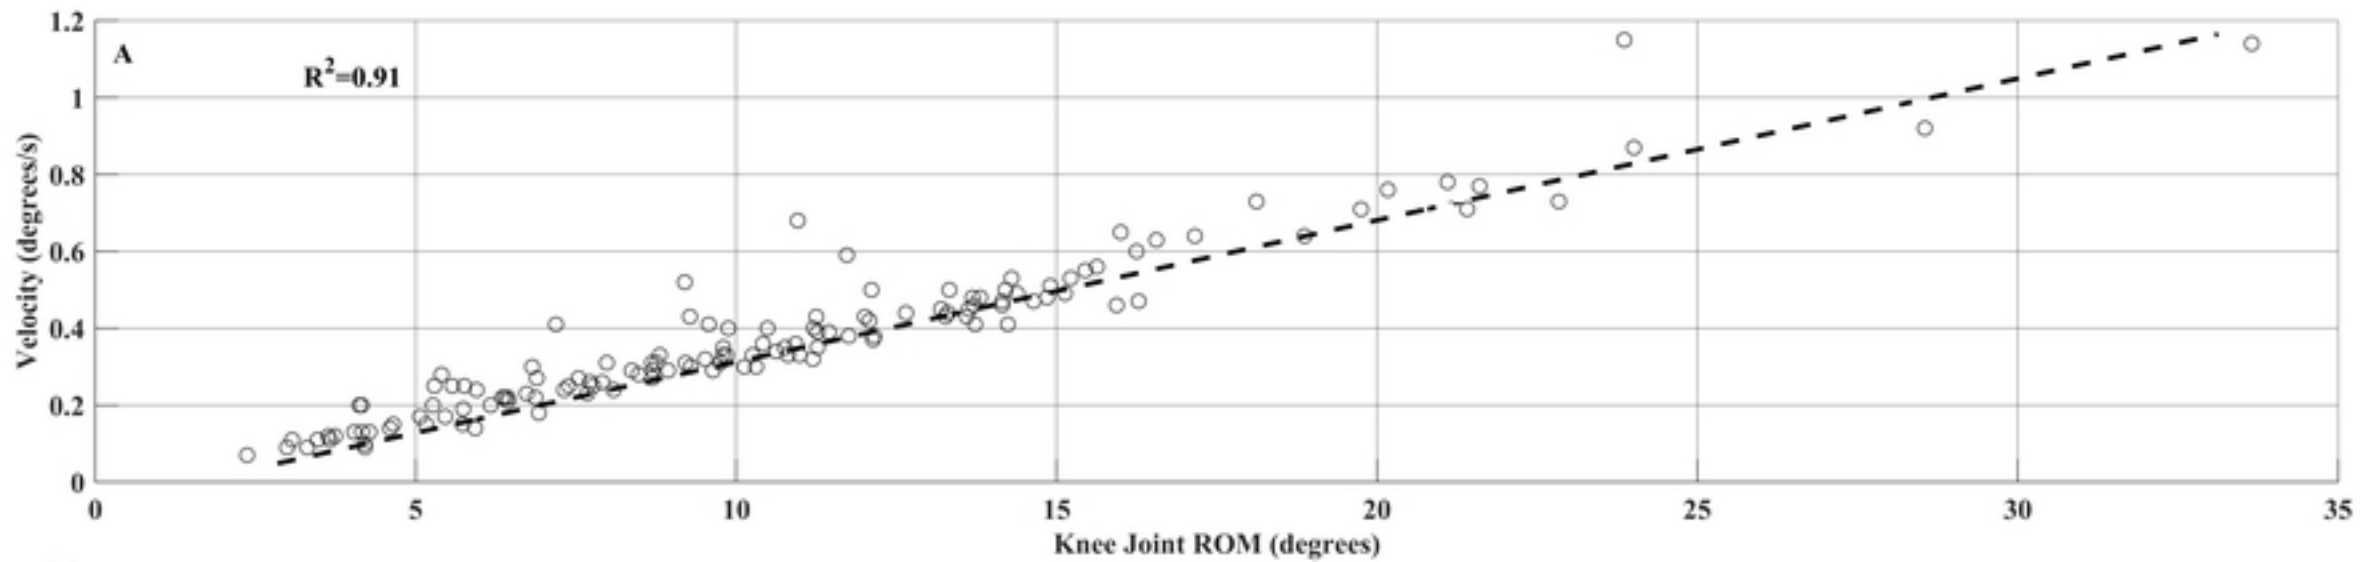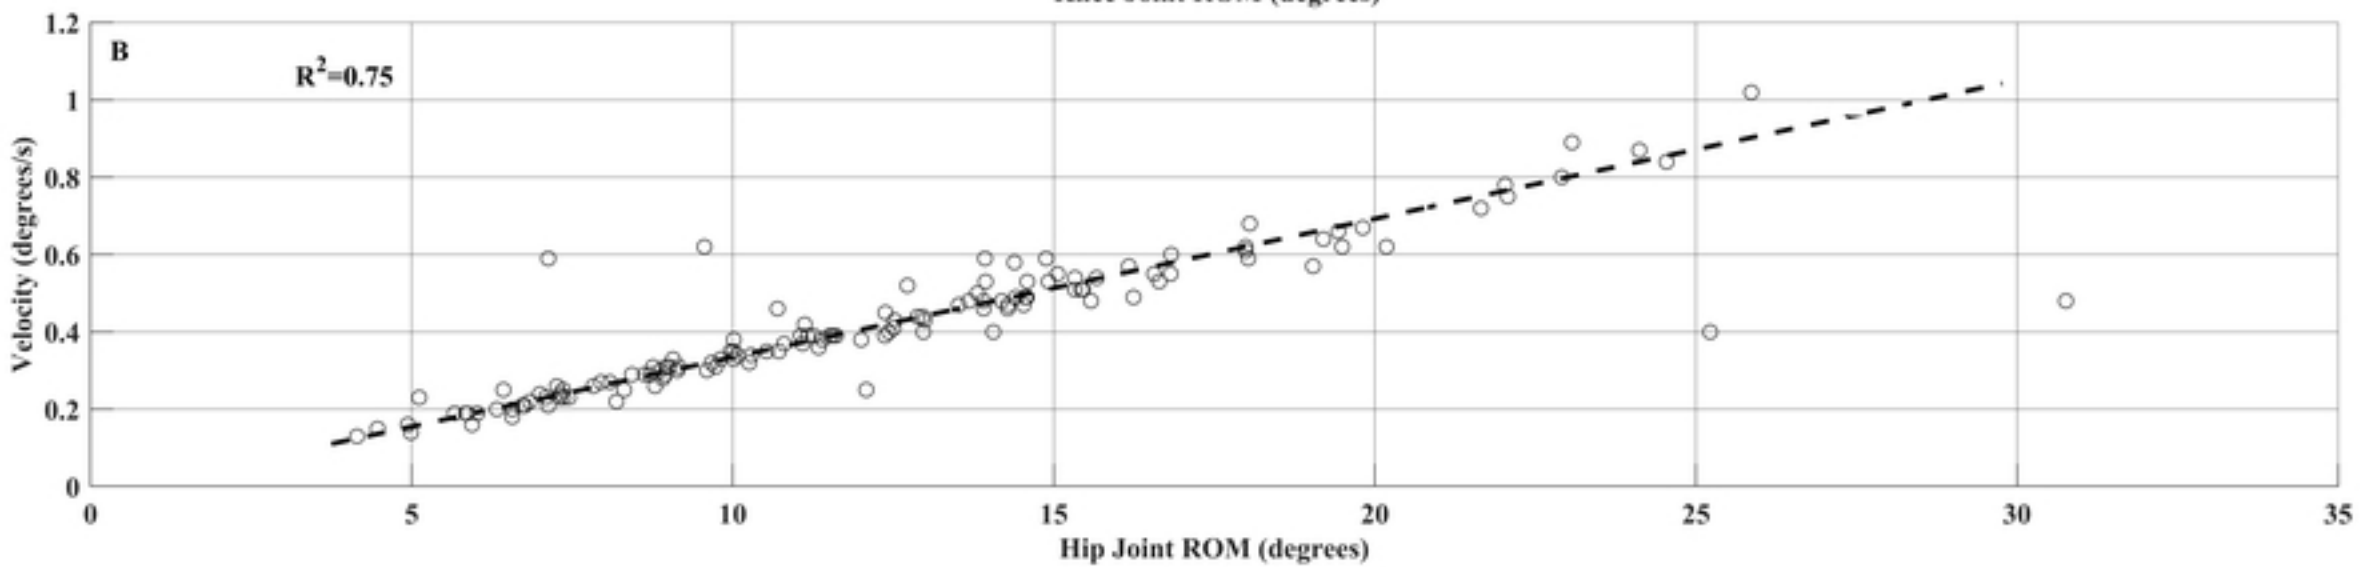

Fig 4

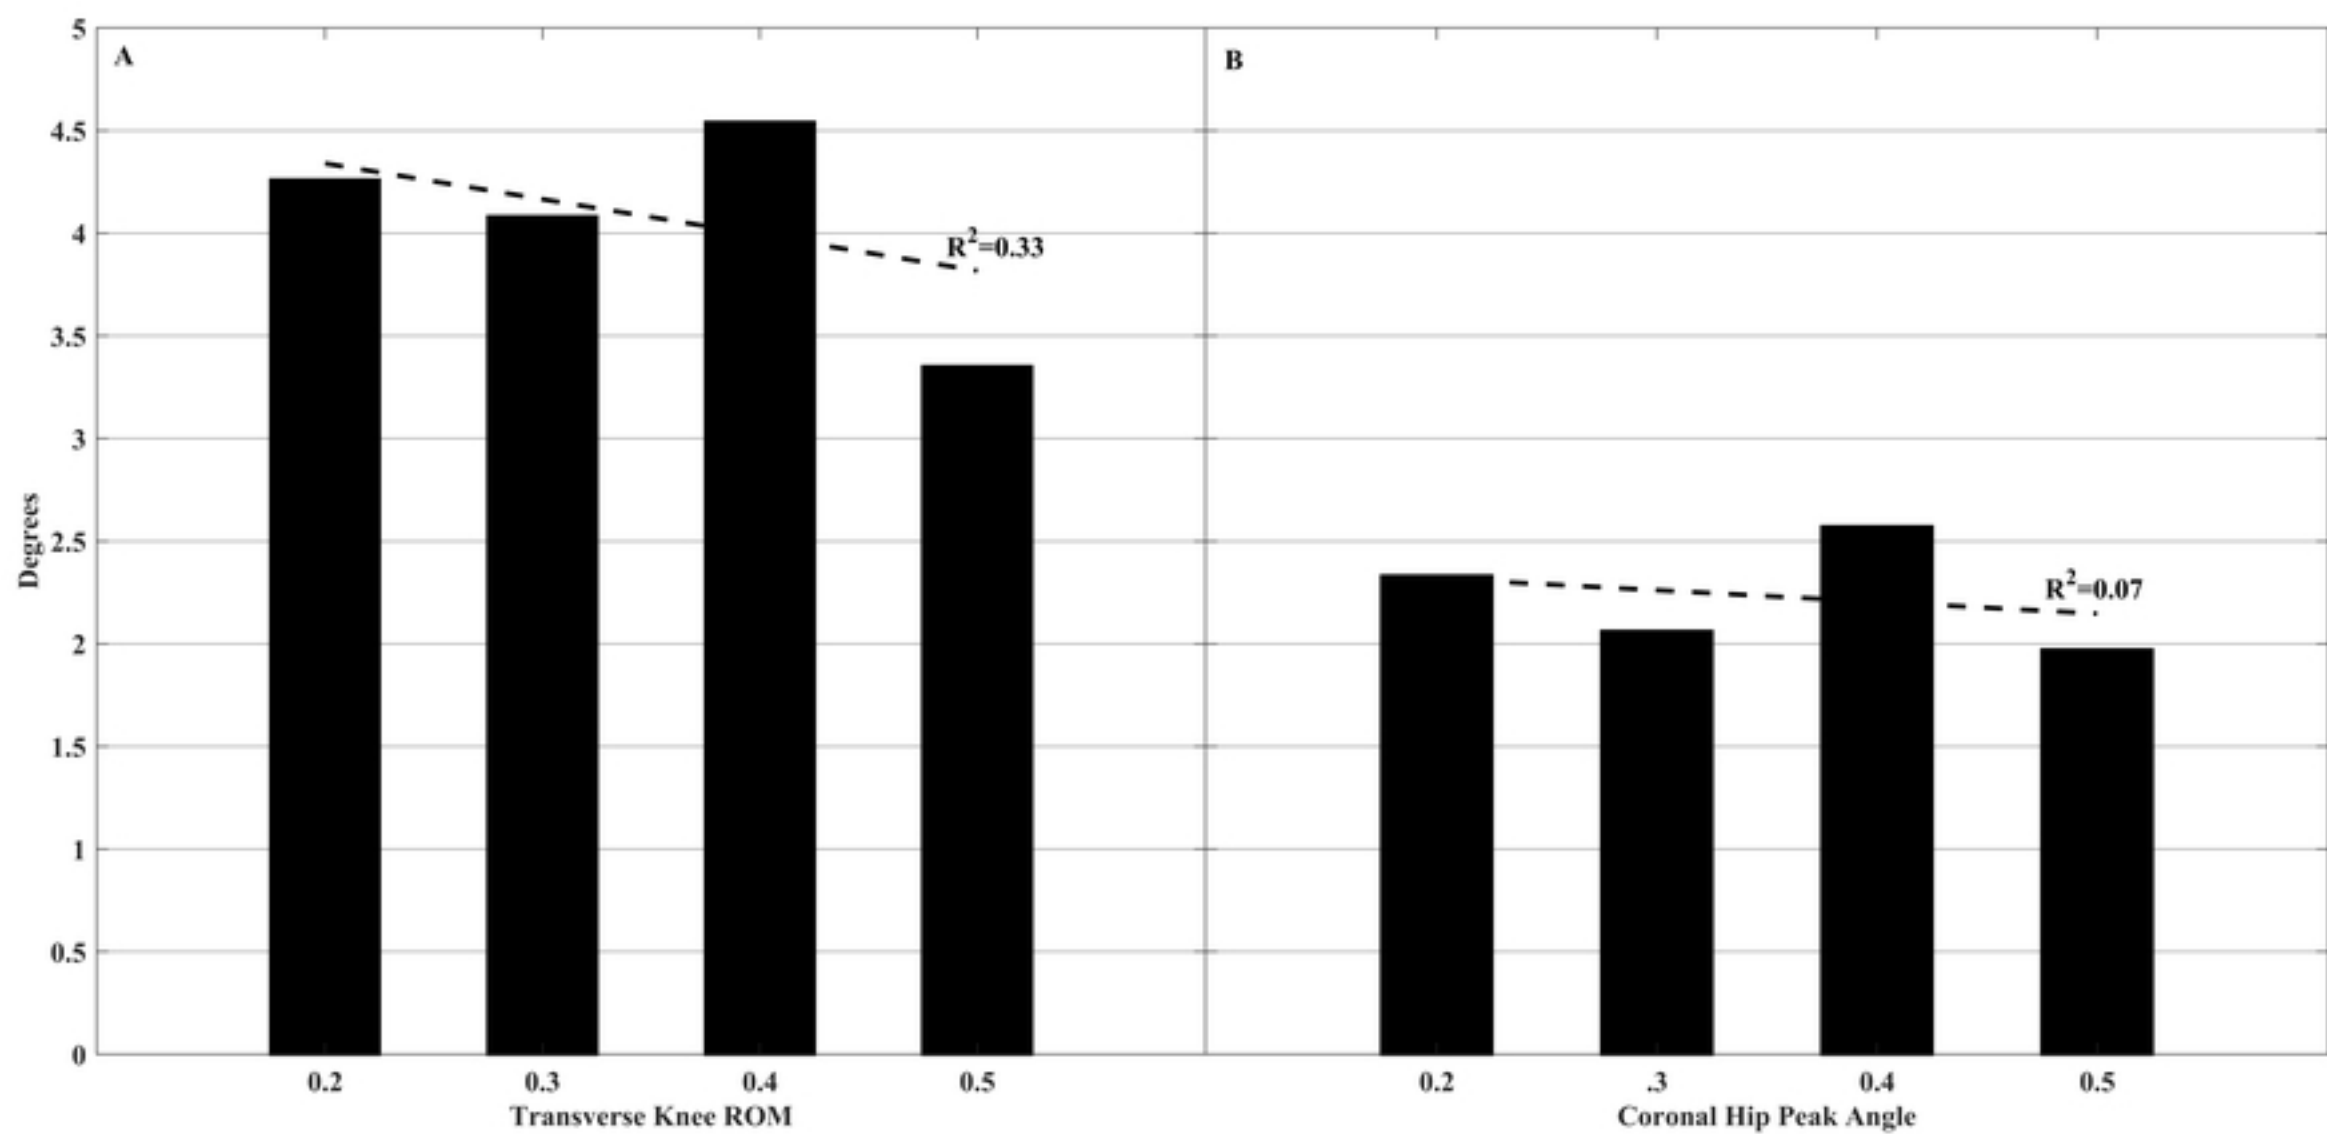

Fig 5
